# Supplementary material for: Elucidating the impact of point defects on the structural, electronic, and mechanical behaviour of chromium nitride
Source: Royal Society of Chemistry journal article supplement (doi:10.1039/d5cp02904j), 2025-01-01

— **Pristine**
— **VN<sup>x</sup>**
— **ON<sup>x</sup>**
— **HN<sup>x</sup>**

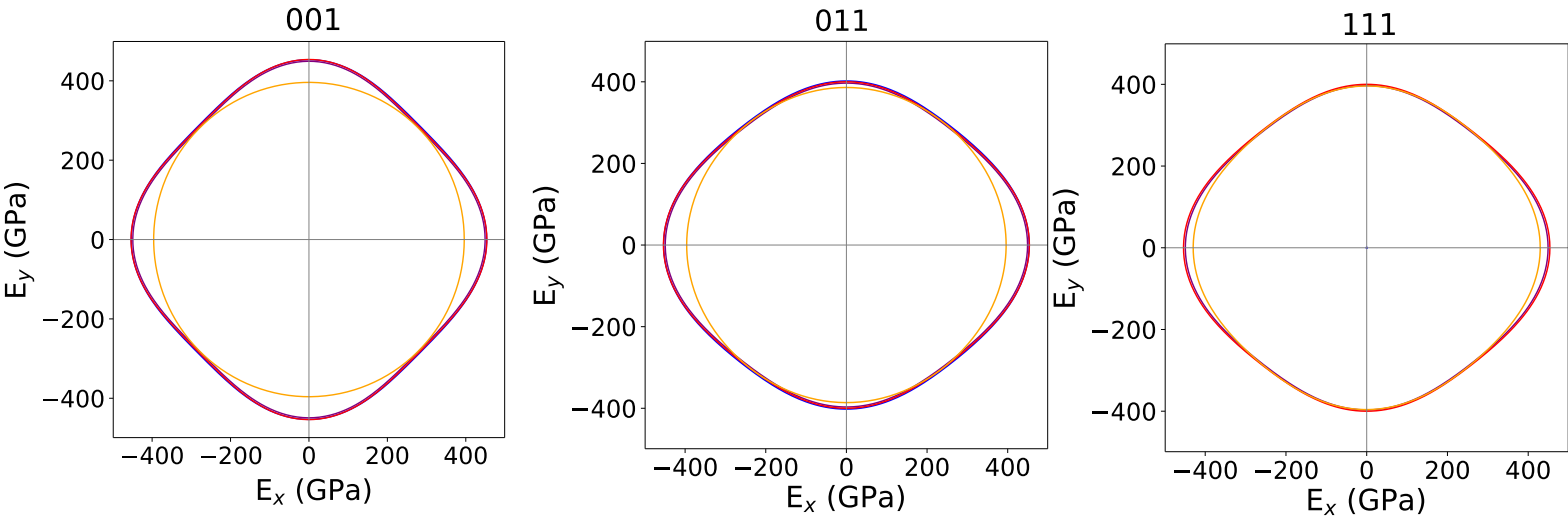

Supplement: d5cp02904j2.pdf [file d5cp02904j2.pdf]
