# Supplementary material for: Elucidating the impact of point defects on the structural, electronic, and mechanical behaviour of chromium nitride
Source: Royal Society of Chemistry journal article supplement (doi:10.1039/d5cp02904j), 2025-01-01

a.

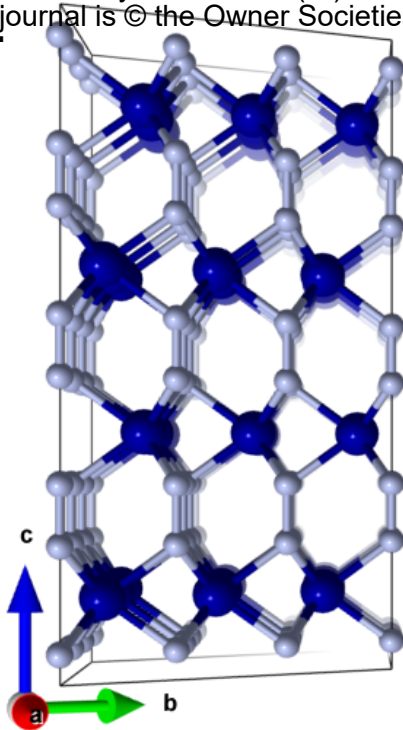

b.

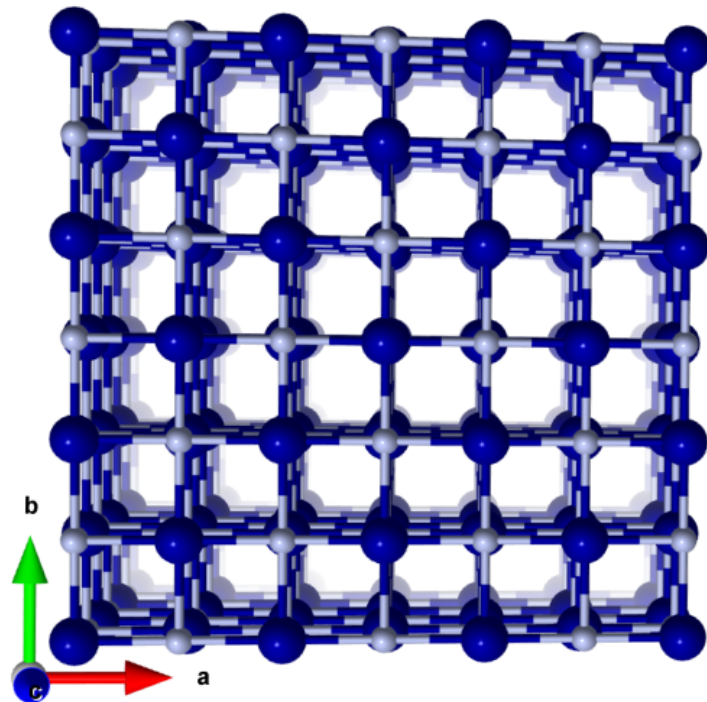

Supplement: d5cp02904j4.pdf [file d5cp02904j4.pdf]
