# Supplementary material for: Elucidating the impact of point defects on the structural, electronic, and mechanical behaviour of chromium nitride
Source: Royal Society of Chemistry journal article supplement (doi:10.1039/d5cp02904j), 2025-01-01

## A) $\text{CrN}_2$

### Hydrogen interstitial defects

(a)

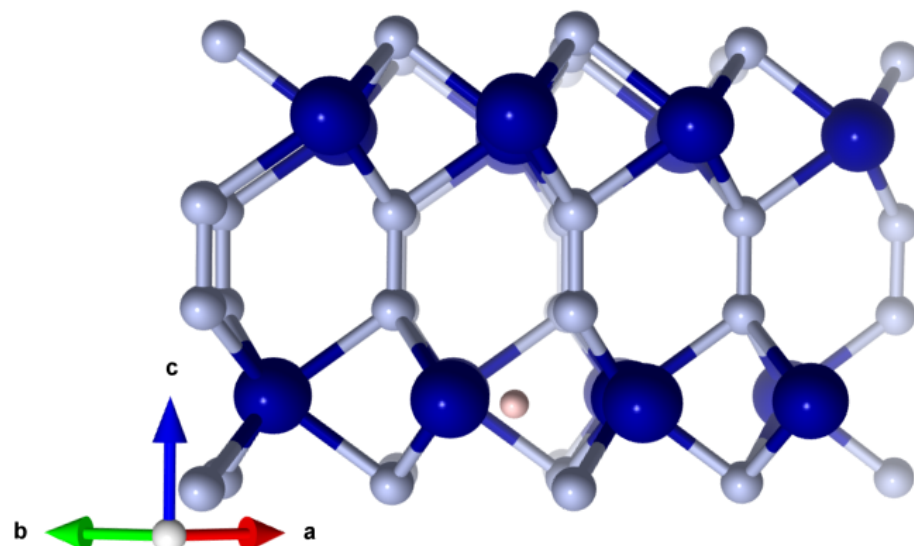

(b)

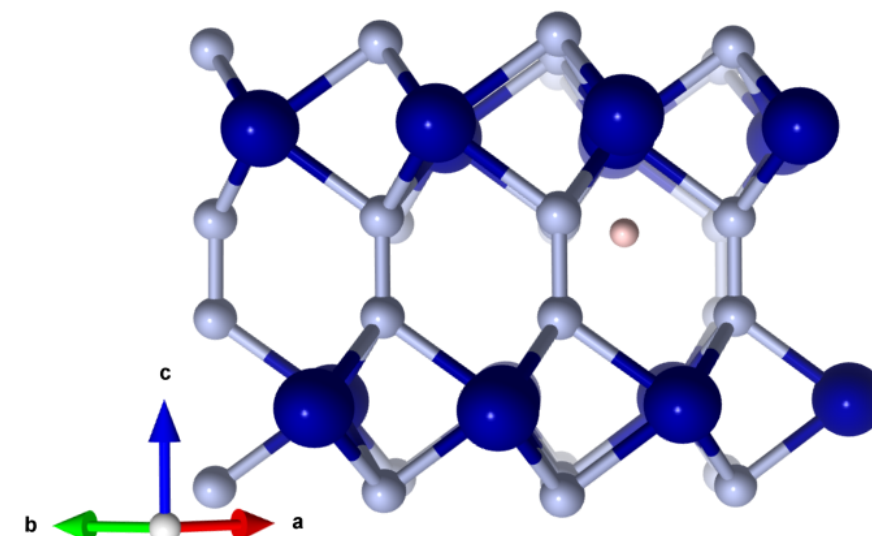

## B) $\text{CrN}$

### Split-interstitial (tetrahedral) defects

(a)

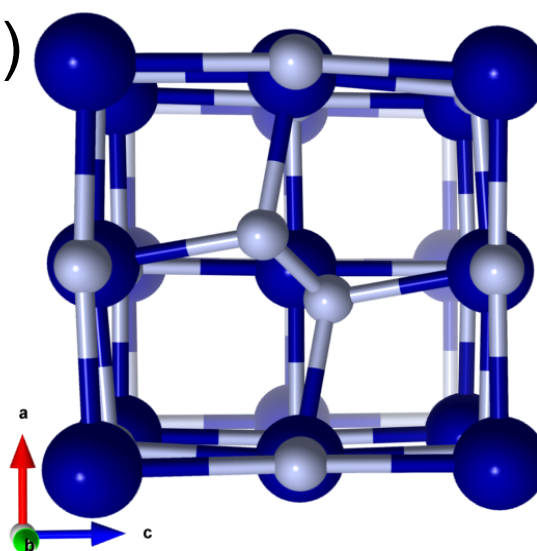

(b)

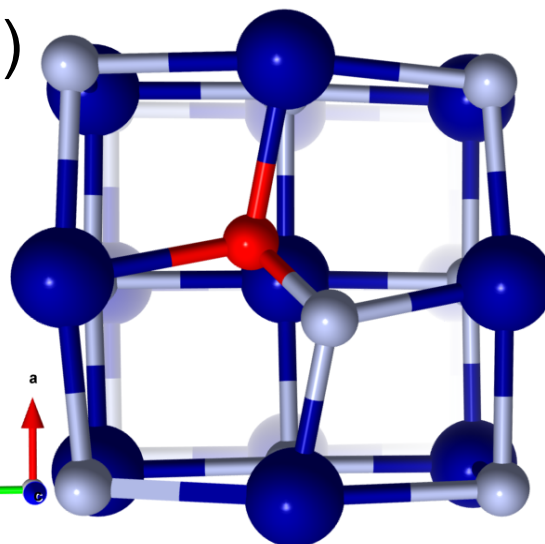

### Substitutional defect

(c)

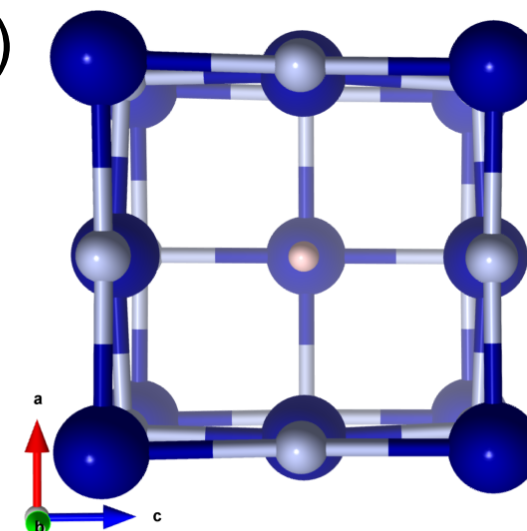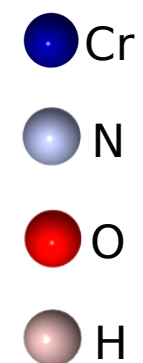

### Octahedral defects

(d)

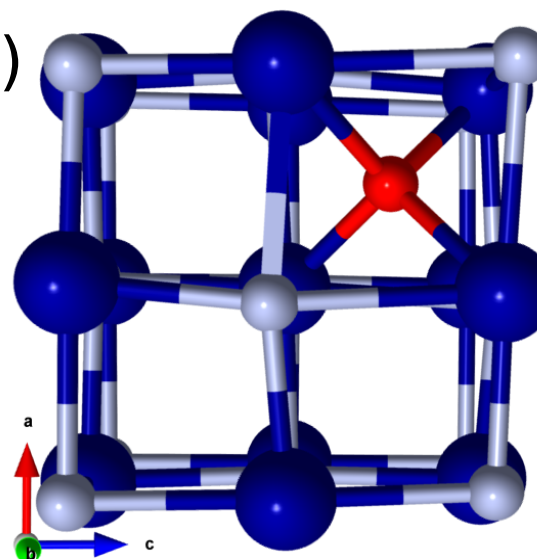

(e)

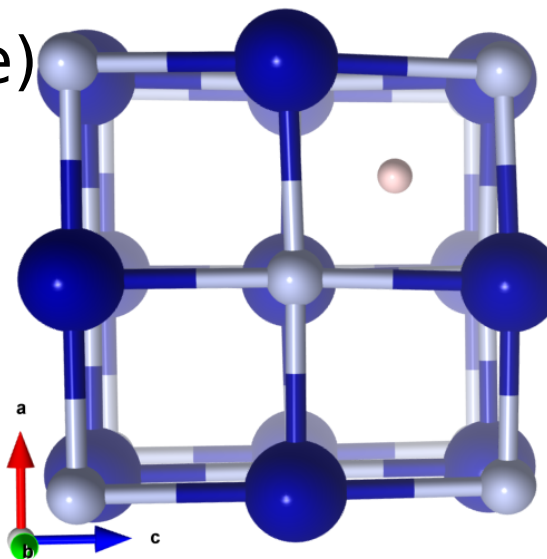

### In-bond defects

(f)

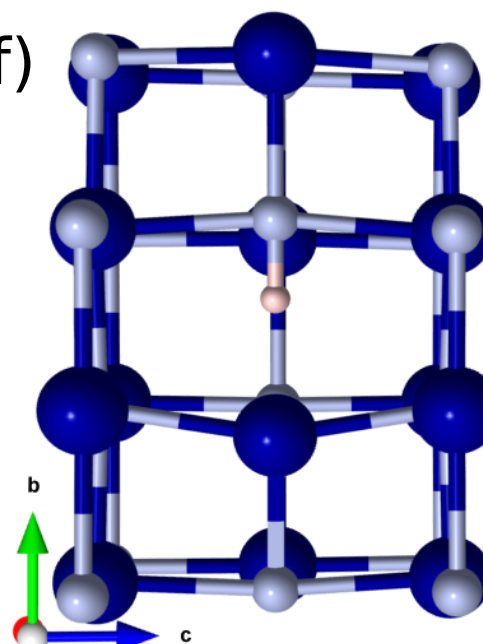

(g)

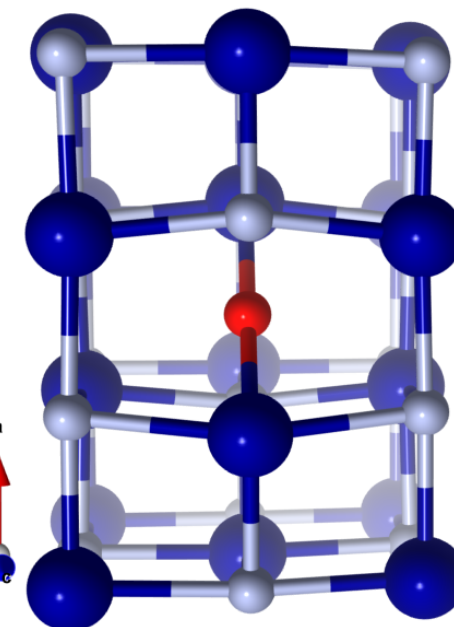

Supplement: d5cp02904j6.pdf [file d5cp02904j6.pdf]
