# Supplementary material for: Elucidating the impact of point defects on the structural, electronic, and mechanical behaviour of chromium nitride
Source: Royal Society of Chemistry journal article supplement (doi:10.1039/d5cp02904j), 2025-01-01

a. Pristine

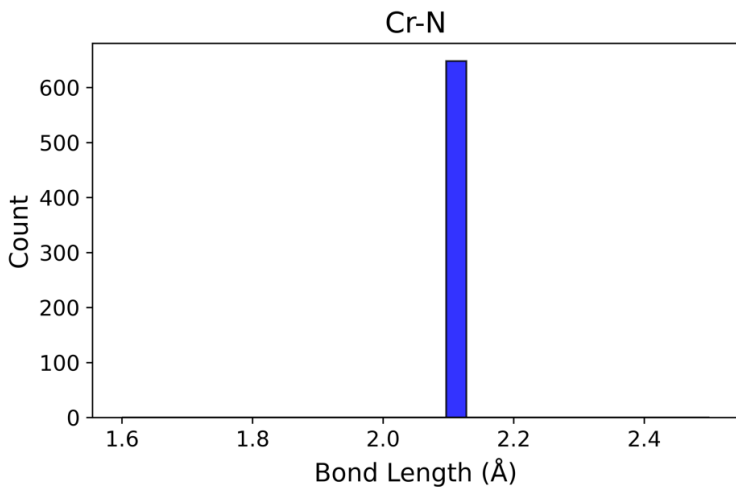

b.  $V_N^x$

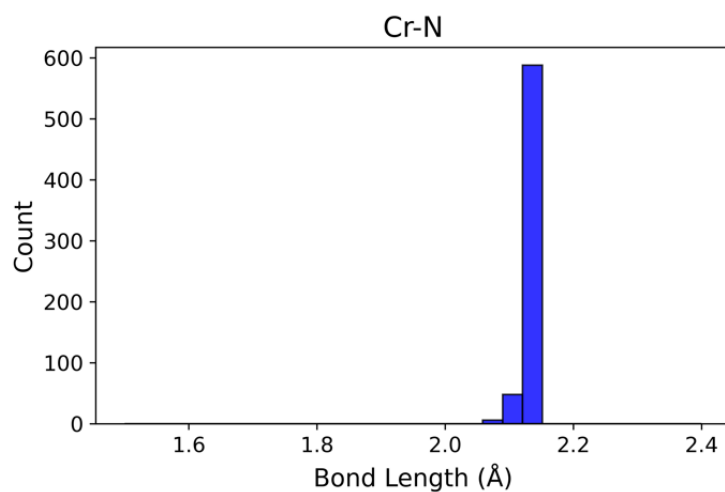

c.  $H_N^x$

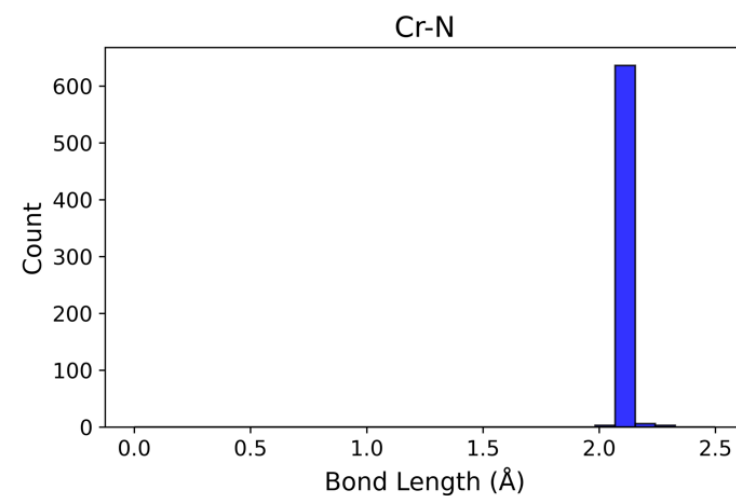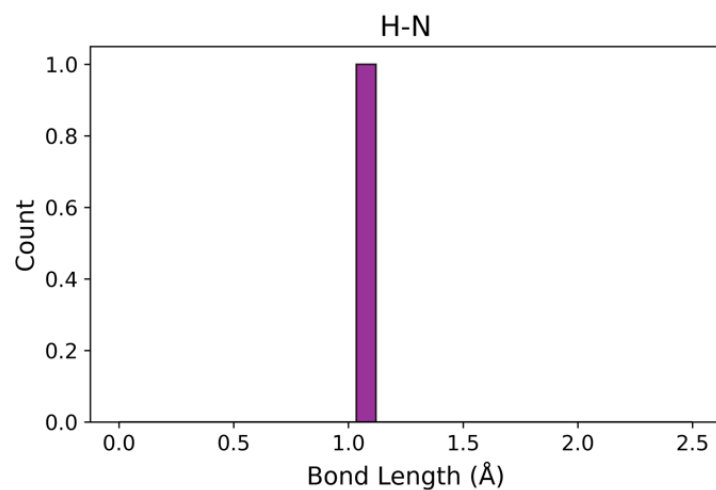

d.  $O_N^x$

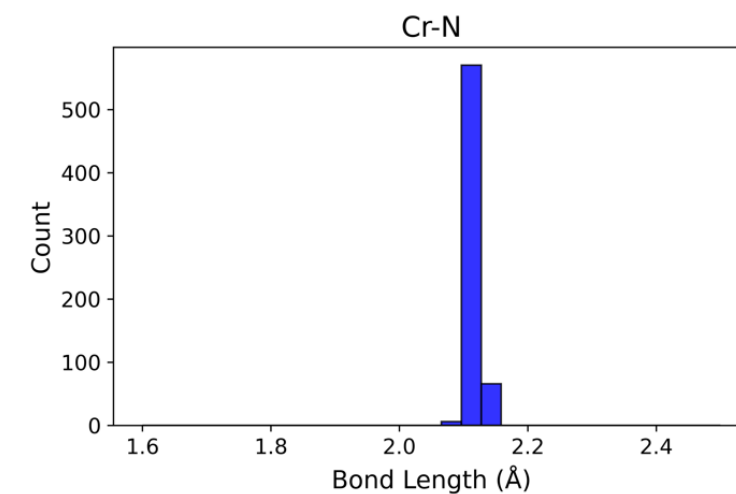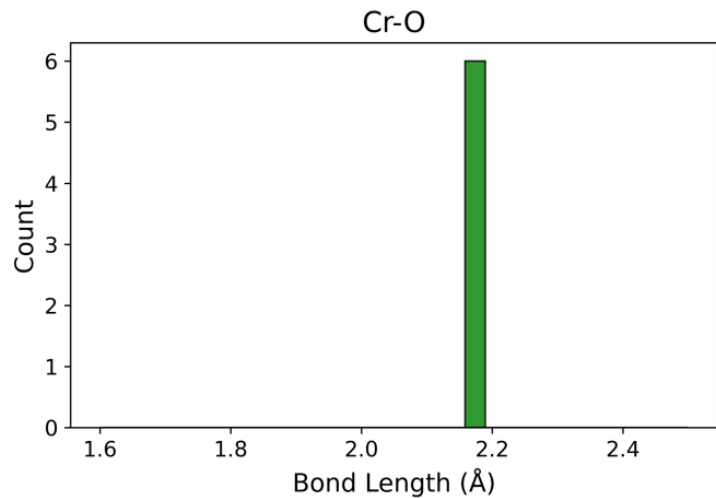

Supplement: d5cp02904j8.pdf [file d5cp02904j8.pdf]
