# Supplementary material for: Elucidating the impact of point defects on the structural, electronic, and mechanical behaviour of chromium nitride
Source: Royal Society of Chemistry journal article supplement (doi:10.1039/d5cp02904j), 2025-01-01
Supplement: d5cp02904j11.pdf [file d5cp02904j11.pdf]

PDOS (states/eV)

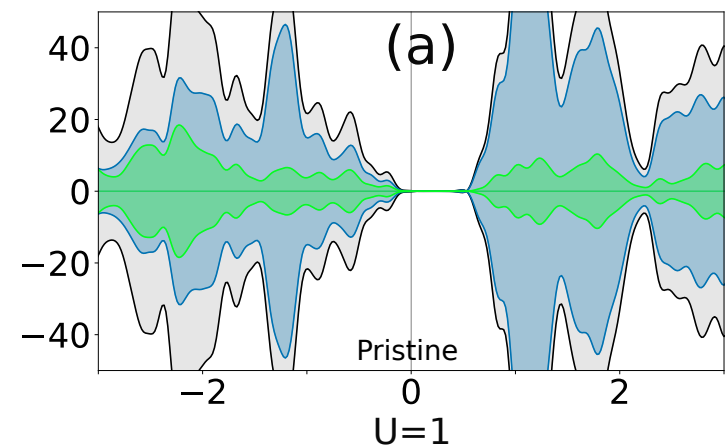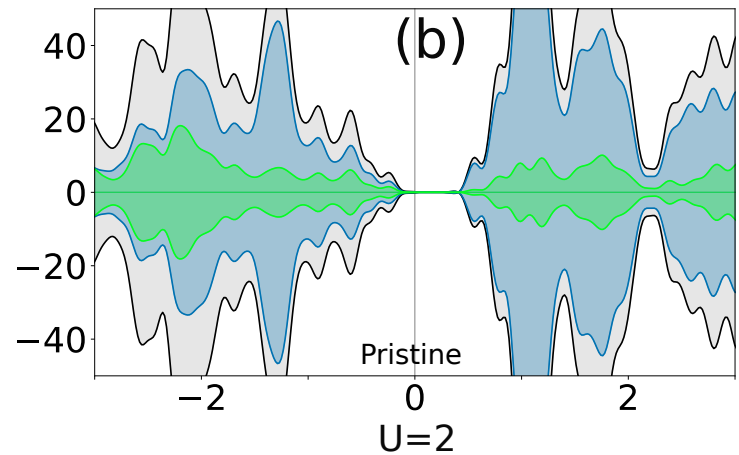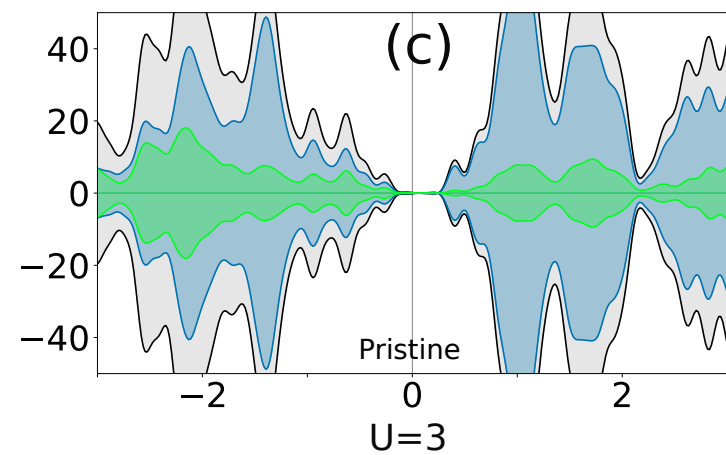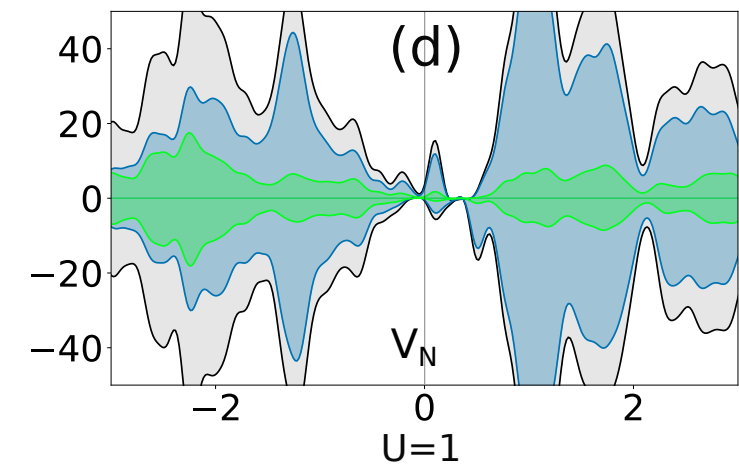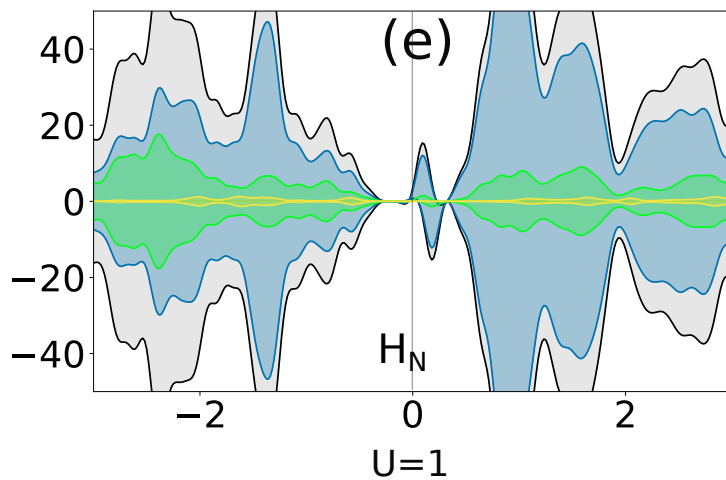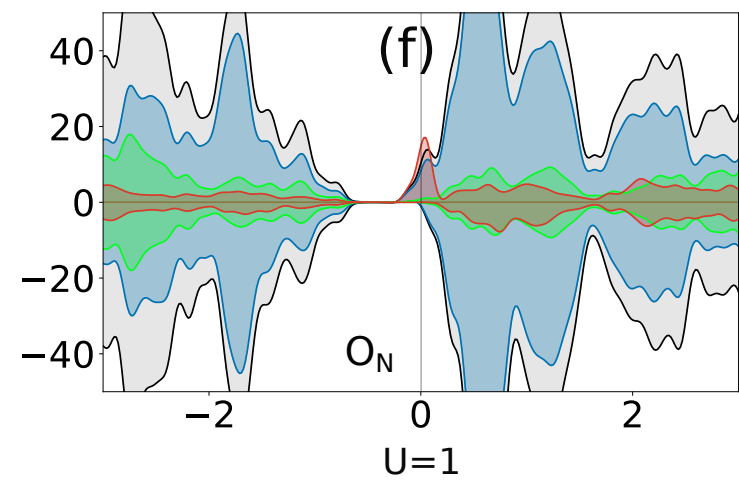

$E-E_F$  (eV)
